# Supplementary material for: Dynamic Amazonia: The EU–Mercosur Trade Agreement and Deforestation
Source: MDPI journal article supplement (doi:10.3390/land10111243), 2021-11-13
Supplement: s1 [file s1]

# Dynamic Amazonia: The EU–Mercosur Trade Agreement and Deforestation

## Supplementary Information

**Table S1.** Details of current tariff regime and quotas for relevant agricultural products.

| Commodity                        | Current tariff regime                                                                                            | Regime under FTA                                                                                                         |
|----------------------------------|------------------------------------------------------------------------------------------------------------------|--------------------------------------------------------------------------------------------------------------------------|
| Beef, fresh & chilled            | 12.8% + between EUR 176.80 and EUR 303.40 /100kg.                                                                | 7.5% tariff for 54,450 tonnes                                                                                            |
| Beef, frozen                     | 12.8% + between EUR 141.40 EUR and EUR 304.1 /100kg.                                                             | 7.5% tariff for 44,550 tonnes                                                                                            |
| Beef - high quality fresh&frozen | In-quota tariff: 20% (10,000 tonnes Brazil, 6,376 tonnes Uruguay, 29,500 tonnes Argentina, 1,000 tonnes Paraguay | In-quota tariff: 0%                                                                                                      |
| Pork - fresh & chilled           | Between EUR 46.7 and EUR 86.9 / 100kg                                                                            | 25,000 tonnes at EUR 83 / tonne                                                                                          |
| Pork - frozen                    | Between EUR 46.7 and EUR 86.9 / 100kg                                                                            |                                                                                                                          |
| Pork - processed                 | Between EUR 46.7 and EUR 151.2 /100kg                                                                            |                                                                                                                          |
| Poultry - with bones             | For chicken only: Between EUR 26.2 and EUR 100.8 /100kg                                                          | 0% tariff for 90,000 tonnes (covers all poultry)                                                                         |
| Poultry - boneless               | For chicken only: between EUR 18.7 and EUR 102.4 / 100kg                                                         | 0% tariff for 90,000 tonnes                                                                                              |
| Sugar for refining               | For Brazil: 180,000 tonnes at EUR98/tonne. Other Mercosur countries: 33.9 EUR/100kg                              | Brazil in-quota tariff = 0, New quota for Paraguay, 10,000 at 0%. Otherwise remains as baseline.                         |
| Ethanol                          | Between EUR10.2 and EUR 19.2 / hectolitre                                                                        | 0% tariff for 450,000 tonnes, only for chemical use. 1/3 baseline tariff for 200,000 tonnes for any use (including fuel) |
| Oilseeds                         | Import tariff = 0. Argentina imposes export tariff of 18%                                                        | Tariff free, both import and export                                                                                      |

**Table S2.** Descriptive statistics of variables used in the regression with source.

| Variable              | Obs       | Mean     | Std. Dev. | Min      | Max      | Unit      |
|-----------------------|-----------|----------|-----------|----------|----------|-----------|
| dft <sup>1</sup>      | 4,943,201 | .0709959 | .256818   | 0        | 1        | Binary    |
| d2unp <sup>2</sup>    | 4,943,201 | 10.44046 | 10.05844  | 0        | 49.30135 | x10,000m  |
| d2pvd <sup>3</sup>    | 4,943,201 | 16.74044 | 13.79114  | 0        | 73.67928 | x10,000m  |
| d2dft <sup>4</sup>    | 4,943,201 | .7691481 | .8121651  | 0        | 6.110728 | x10,000m  |
| trmm <sup>5</sup>     | 4,943,201 | 2.346438 | .4305433  | 1.193647 | 4.382253 | in meters |
| indg <sup>6</sup>     | 4,943,201 | .2329913 | .4227368  | 0        | 1        | Binary    |
| ucei <sup>7</sup>     | 4,943,201 | .0279285 | .1647679  | 0        | 1        | Binary    |
| ucfi <sup>8</sup>     | 4,943,201 | .0687538 | .2530351  | 0        | 1        | Binary    |
| ucfus <sup>9</sup>    | 4,943,201 | .0729254 | .2600141  | 0        | 1        | Binary    |
| soilmod <sup>10</sup> | 4,943,201 | .0905796 | .2870103  | 0        | 1        | Binary    |
| soilsev <sup>11</sup> | 4,943,201 | .5636093 | .4959374  | 0        | 1        | Binary    |
| projass <sup>12</sup> | 4,943,201 | .0452051 | .2077538  | 0        | 1        | Binary    |

Note 1: water bodies, non-forested areas, and areas deforested prior to 2001 were masked out. Therefore, these numbers do not necessarily correspond to the statistics for the Amazon as a whole.

Note 2: the estimation procedure requires a computationally intensive matrix inversion that can cause singularity issues if the variables are not properly scaled. Scaled variables were linearly transformed, which does not change the regression results.

<sup>1</sup> dft: accumulated deforestation from 2001-2018. Source: Mapbiomas Collection 4.1. <https://mapbiomas.org/en/download> (accessed on 18 May 2020)

<sup>2</sup> d2unp: Euclidean distance to unpaved roads. Subset of unpaved roads was created by removing the roads with attributes 'pavimentada', 'duplicada', 'planejada', and 'travessia'. The remaining segments correspond to unpaved roads. Source: Ministerio do Meio Ambiente (MMA). Geoprocessamento. URL: <http://www.mma.gov.br/governanca-ambiental/geoprocessamento>. (Accessed on Feb 21 2017).

<sup>3</sup> d2pvd: Euclidean distance to paved roads, also from the same dataset above, selected segments with attributes 'pavimentada' or 'duplicada'.

<sup>4</sup> d2dft: Euclidean distance to previously deforestation up to base year of 2000. Source: same as dft.

<sup>5</sup> trmm: Annual mean precipitation, calculated using TRMM data from 1999-2018 using simple raster algebra. Source: NASA. <ftp://disc3.nascom.nasa.gov> (Accessed on Nov 04 2019).

<sup>6</sup> indg: Indigenous lands included all demarcated lands but not 'em estudo' or 'planejamento'. Source: MMA.

<sup>7,8</sup> ucei, ucfi: Conservation units at state and federal levels, integral protection. Source: MMA.

<sup>9</sup> ucfus: Federal conservation units, sustainable use. Source: MMA.

<sup>10,11</sup> soilmod, soilsev: Soil types: moderate restrictions to agriculture (category 2), severe restrictions (category 3), and omitted variable is very severe restrictions. Source: Harmonized World Soil Database v1.2, FAO. Accessed on October 10 2015.

<sup>12</sup> projass: Settlement projects included polygons with attributes 'projeto de assentamento', 'projeto integrado de colonização', and 'projeto agroextrativista'. Source: INCRA. URL: <https://acervofundiario.incra.gov.br/acervo/acv.php> (Accessed on: May 19 2020).

**Table S3.** EU imports of pork and poultry by exporting region for all examined scenarios (in million USD).

| Region | Base   | S11    | S12    | S13    | S21    | S22    | S23    |
|--------|--------|--------|--------|--------|--------|--------|--------|
| US     | 370    | 366    | 366    | 366    | 364    | 364    | 364    |
| EU     | 33,525 | 32,950 | 32,950 | 32,950 | 32,792 | 32,792 | 32,792 |
| Brazil | 1,619  | 1,649  | 1,649  | 1,649  | 1,660  | 1,659  | 1,659  |
| China  | 318    | 314    | 314    | 314    | 313    | 313    | 313    |
| OCSA   | 431    | 1,351  | 1,351  | 1,351  | 1,604  | 1,604  | 1,604  |
| Other  | 2,093  | 2,067  | 2,067  | 2,067  | 2,058  | 2,058  | 2,058  |
| Total  | 38,357 | 38,696 | 38,696 | 38,696 | 38,791 | 38,791 | 38,791 |

**Table S4.** Impacts of the EMTA on harvested area by region (in hectares).

| Scenarios | Crops          | EU      | Brazil  | OCSA    | Others  | Total   |
|-----------|----------------|---------|---------|---------|---------|---------|
| S11       | Soybeans       | -5,238  | 54,642  | 46,358  | -40,740 | 55,023  |
|           | Other oilseeds | -16,481 | 868     | -8,359  | -18,309 | -42,281 |
|           | Sugar crops    | -1,497  | 109,884 | 4,489   | -1,766  | 111,110 |
|           | Other crops    | 8,319   | 44,976  | -33,782 | 48,656  | 68,170  |
|           | Total          | -14,896 | 210,369 | 8,707   | -12,158 | 192,022 |
| S12       | Soybeans       | -5,274  | 64,070  | 45,632  | -43,985 | 60,444  |
|           | Other oilseeds | -17,423 | 1,108   | -8,483  | -20,831 | -45,628 |
|           | Sugar crops    | -1,484  | 109,452 | 4,515   | -1,634  | 110,850 |
|           | Other crops    | 8,682   | 51,999  | -33,293 | 49,431  | 76,818  |
|           | Total          | -15,498 | 226,629 | 8,372   | -17,018 | 202,484 |
| S13       | Soybeans       | -5,277  | 64,812  | 45,560  | -44,316 | 60,779  |
|           | Other oilseeds | -17,520 | 1,122   | -8,496  | -21,090 | -45,983 |
|           | Sugar crops    | -1,483  | 109,359 | 4,518   | -1,621  | 110,774 |
|           | Other crops    | 8,717   | 52,319  | -33,245 | 49,434  | 77,225  |
|           | Total          | -15,563 | 227,612 | 8,338   | -17,592 | 202,795 |
| S21       | Soybeans       | -41,416 | 8,042   | 96,726  | -58,107 | 5,245   |
|           | Other oilseeds | -1,169  | -604    | -15,795 | -1,343  | -18,911 |
|           | Sugar crops    | -8,721  | 336,912 | 27,756  | -7,032  | 348,915 |
|           | Other crops    | 29,974  | 37,260  | -89,445 | 60,745  | 38,534  |
|           | Total          | -21,332 | 381,610 | 19,242  | -5,737  | 373,783 |

|     |                |         |         |         |         |         |
|-----|----------------|---------|---------|---------|---------|---------|
| S22 | Soybeans       | -41,621 | 30,684  | 94,588  | -67,529 | 16,122  |
|     | Other oilseeds | -2,948  | -248    | -15,968 | -6,196  | -25,360 |
|     | Sugar crops    | -8,702  | 337,078 | 27,813  | -6,902  | 349,287 |
|     | Other crops    | 30,775  | 47,204  | -87,904 | 65,209  | 55,284  |
|     | Total          | -22,496 | 414,718 | 18,529  | -15,418 | 395,333 |
| S23 | Soybeans       | -41,643 | 32,676  | 94,362  | -68,518 | 16,878  |
|     | Other oilseeds | -3,133  | -228    | -15,987 | -6,664  | -26,012 |
|     | Sugar crops    | -8,700  | 337,027 | 27,819  | -6,889  | 349,256 |
|     | Other crops    | 30,861  | 47,562  | -87,745 | 65,555  | 56,232  |
|     | Total          | -22,614 | 417,037 | 18,448  | -16,517 | 396,354 |

**Table S5.** Impacts of the EMTA on land cover by region (in hectares).

| Scenarios | Land Types | EU     | Brazil   | OCSA    | Others | Total    |
|-----------|------------|--------|----------|---------|--------|----------|
| S11       | Forest     | 3,120  | -55,728  | -66,504 | 9,680  | -109,432 |
|           | Pasture    | -148   | 12,928   | 58,592  | -5,760 | 65,612   |
|           | Cropland   | -2,972 | 42,800   | 7,912   | -3,920 | 43,820   |
| S12       | Forest     | 3,184  | -78,352  | -66,712 | 10,304 | -131,576 |
|           | Pasture    | -80    | 14,192   | 59,136  | -4,960 | 68,288   |
|           | Cropland   | -3,104 | 64,160   | 7,576   | -5,344 | 63,288   |
| S13       | Forest     | 3,184  | -110,752 | -66,752 | 10,368 | -163,952 |
|           | Pasture    | -68    | -35,056  | 59,216  | -4,944 | 19,148   |
|           | Cropland   | -3,116 | 145,808  | 7,536   | -5,424 | 144,804  |
| S21       | Forest     | 5,424  | -83,584  | -86,840 | 10,928 | -154,072 |
|           | Pasture    | -1,164 | 6,192    | 69,056  | -9,360 | 64,724   |
|           | Cropland   | -4,260 | 77,392   | 17,784  | -1,568 | 89,348   |
| S22       | Forest     | 5,520  | -112,544 | -87,456 | 11,936 | -182,544 |
|           | Pasture    | -1,052 | -4,416   | 70,352  | -7,360 | 57,524   |
|           | Cropland   | -4,468 | 116,960  | 17,104  | -4,576 | 125,020  |
| S23       | Forest     | 5,552  | -172,960 | -87,552 | 11,984 | -242,976 |
|           | Pasture    | -1,032 | -93,920  | 70,496  | -7,088 | -31,544  |
|           | Cropland   | -4,520 | 266,880  | 17,056  | -4,896 | 274,520  |

**Table S6.** Percent change in EU imports of Ethanol from Brazil (percentage change).

| Scheme 11. | S11  | S12  | S13  | S21   | S22   | S23   |
|------------|------|------|------|-------|-------|-------|
| % change   | 6.45 | 6.47 | 6.47 | 10.40 | 10.46 | 10.47 |

**Table S7.** Bayesian spatial probit regression analysis results (n= 4,943,201).

| Variable | Coefficient | Std Deviation | p-value |
|----------|-------------|---------------|---------|
| const    | 0.0864      | 0.1758        | 0.382   |
| d2unp    | -0.0473     | 0.0034        | 0.000   |
| d2pvd    | -0.0118     | 0.0017        | 0.000   |
| d2dft    | 0.1884      | 0.0369        | 0.000   |
| trmm     | -0.9134     | 0.0681        | 0.000   |
| indg     | -1.1580     | 0.0278        | 0.000   |
| ucei     | -1.1795     | 0.0323        | 0.000   |
| ucfi     | -1.1935     | 0.0179        | 0.000   |
| ucfus    | -0.7328     | 0.0171        | 0.000   |
| soilmod  | 0.2146      | 0.0076        | 0.000   |
| soilsev  | 0.1810      | 0.0059        | 0.000   |
| projass  | 0.6964      | 0.0090        | 0.000   |

**Table S8.** Cross-tabulation of predicted vs. actual deforestation on a pixel-by-pixel basis.

|        |            | Predicted |            |           |
|--------|------------|-----------|------------|-----------|
|        |            | Forest    | Deforested | All       |
| Actual | Forest     | 4,402,347 | 189,907    | 4,592,254 |
|        | Deforested | 189,907   | 161,040    | 350,947   |
|        | All        | 4,592,254 | 350,947    | 4,943,201 |

**Table S9.** Cross-tabulation of predicted vs. actual deforestation Hagen's two-way fuzzy similarity index.

|        |            | Predicted |            |
|--------|------------|-----------|------------|
|        |            | Forest    | Deforested |
| Actual | Forest     | 1.000     | 0.342      |
|        | Deforested | 0.153     | 1.000      |

Overall mean = 0.942

**Table S10.** Indigenous and conservation areas within 5 km from hotspots of deforestation.

| NAME                                          | CATEGORY           | LEVEL    | YEAR CREATED |
|-----------------------------------------------|--------------------|----------|--------------|
| Karipuna                                      | Indigenous         | Federal  | 1999         |
| Badjonkore                                    | Indigenous         | Federal  | 2004         |
| Kayapó                                        | Indigenous         | Federal  | 1989         |
| Parakana                                      | Indigenous         | Federal  | 1989         |
| Maraiwatsede                                  | Indigenous         | Federal  | 1999         |
| Urubu Branco                                  | Indigenous         | Federal  | 1999         |
| Batelao                                       | Indigenous         | Federal  | 2007         |
| Apyterewa                                     | Indigenous         | Federal  | 2008         |
| Trincheira Bacaja                             | Indigenous         | Federal  | 1998         |
| Alto Rio Guamá                                | Indigenous         | Federal  | 1994         |
| Manoki                                        | Indigenous         | Federal  | 2008         |
| Cachoeira Seca                                | Indigenous         | Federal  | 2009         |
| Parque Nacional Dos Campos Amazônicos         | Park               | Federal  | 2006         |
| Reserva Biológica Nascentes Serra Do Cachimbo | Biological Reserve | Federal  | 2005         |
| Reserva Biológica Do Tapirapé                 | Biological Reserve | Federal  | 1989         |
| Parque Estadual De Guajará-Mirim              | Park               | Estadual | 1990         |
| Parque Estadual De Corumbiara                 | Park               | Estadual | 1990         |
| Floresta Nacional De Itacaiunas               | National Forest    | Federal  | 1998         |
| Floresta Nacional De Tapirapé-Aquiri          | National Forest    | Federal  | 1989         |
| Floresta Nacional De Bom Futuro               | National Forest    | Federal  | 1988         |
| Floresta Nacional Do Jamanxim                 | National Forest    | Federal  | 2006         |
